# Supplementary material for: Cobalt diphosphonate with a new double chain structure exhibiting field-induced magnetic transition
Source: Royal Society of Chemistry journal article supplement (doi:10.1039/b709474d), 2007-01-01
Supplement: b709474d.pdf [file b709474d.pdf]

### Supporting information

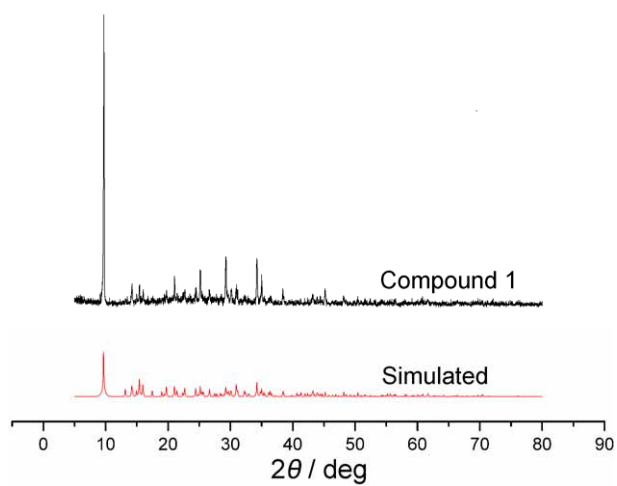

**Figure S1.** XRD patterns of compound **1** compared with its simulated XRD pattern from crystallographic data.
